# Supplementary material
Source: PubMed Central journal article supplement (PMC2896502)
Supplement: NIHMS210769-supplement-1_si_001.pdf [file NIHMS210769-supplement-1_si_001.pdf]

# Supporting Information

## Evolution of Metal Selectivity in Templated Protein Interfaces

Jeffrey D. Brodin<sup>†</sup>, Annette Medina-Morales<sup>†</sup>, Thomas Ni<sup>†</sup>, Eric N. Salgado<sup>†</sup>, Xavier I. Ambroggio<sup>‡</sup>,  
and F. Akif Tezcan<sup>‡\*</sup>

<sup>†</sup>*Department of Chemistry and Biochemistry, University of California, San Diego, La Jolla, CA 92093-0356;* <sup>‡</sup>*Rosetta Design Group LLC, Fairfax, VA 22030*

This file contains Supporting Table S1, DynaFit scripts, Supporting Figures S1-11.

**Table S1. X-ray data collection and refinement statistics.** (\* denotes highest resolution shell).

|                                                         | <sup>96</sup> C RIDC-1 <sub>4</sub>  | Zn <sub>4</sub> : <sup>96</sup> C RIDC-1 <sub>4</sub> | Cu/Zn <sub>4</sub> : <sup>96</sup> C RIDC-1 <sub>4</sub> |
|---------------------------------------------------------|--------------------------------------|-------------------------------------------------------|----------------------------------------------------------|
| Data collection location                                | SSRL BL 9-2                          | SSRL BL 9-2                                           | SSRL BL 7-1                                              |
| Unit cell dimensions (Å)                                | 69.2 x 69.2 x 186.9                  | 63.3 x 76.8 x 177.6                                   | 63.5 x 78.1 x 178.3                                      |
|                                                         | $\alpha = \beta = \gamma = 90^\circ$ | $\alpha = \beta = \gamma = 90^\circ$                  | $\alpha = \beta = \gamma = 90^\circ$                     |
| Symmetry group                                          | <i>I</i> <sub>4</sub>                | <i>P</i> 2 <sub>1</sub> 2 <sub>1</sub> 2 <sub>1</sub> | <i>P</i> 2 <sub>1</sub> 2 <sub>1</sub> 2 <sub>1</sub>    |
| Resolution (Å)                                          | 46.3 – 2.05                          | 88.8 – 2.35                                           | 89.2 – 2.10                                              |
| X-ray wavelength (Å)                                    | 0.98                                 | 0.98                                                  | 1.00                                                     |
| Number of unique reflections                            | 27287                                | 36701                                                 | 49272                                                    |
| Redundancy                                              | 5.0                                  | 4.0                                                   | 9.5                                                      |
| Completeness (%) <sup>*</sup>                           | 99.6 (100)                           | 99.5 (99.9)                                           | 93.6 (84.2)                                              |
| $\langle I / \sigma \rangle$ <sup>*</sup>               | 10.8 (1.5)                           | 4.9 (1.8)                                             | 4.0 (1.5)                                                |
| <i>R</i> <sub>symm</sub> <sup>*</sup> (%)               | 8.0 (44.8)                           | 9.8 (35.6)                                            | 10.2 (17.6)                                              |
| <i>R</i> <sub>work</sub> / <i>R</i> <sub>free</sub> (%) | 22.9 / 27.7                          | 22.8 / 29.6                                           | 22.5 / 27.1                                              |
| Number of atoms                                         |                                      |                                                       |                                                          |
| Protein                                                 | 3272                                 | 6544                                                  | 6544                                                     |
| Ligands/ions                                            | 171                                  | 352                                                   | 352                                                      |
| Water                                                   | 236                                  | 145                                                   | 395                                                      |
| B-factors (Å <sup>2</sup> )                             |                                      |                                                       |                                                          |
| Protein                                                 | 37.2                                 | 47.0                                                  | 27.2                                                     |
| Ligands/ions                                            | 30.1                                 | 41.9                                                  | 27.0                                                     |
| Water                                                   | 42.4                                 | 42.4                                                  | 31.4                                                     |
| R.m.s deviations                                        |                                      |                                                       |                                                          |
| Bond lengths (Å)                                        | 0.015                                | 0.016                                                 | 0.009                                                    |
| Bond angles (°)                                         | 1.46                                 | 1.37                                                  | 1.01                                                     |

## DynaFit Scripts

**Titration of Fura-2 in the presence of EGTA.** This script describes the competition between Fura-2 and EGTA for binding to  $M^{2+}$  ( $Zn^{2+}$  in this example) used to determine the binding constants for Fura-2 metal binding.

[task]

task = fit

data = equilibria

; L ... Fura-2

; E ... EGTA

; M ... Zn

[mechanism]

$L + M \rightleftharpoons LM$  : Kd1 dissoc

$E + M \rightleftharpoons EM$  : Kd2 dissoc

[constants]

Kd1 = 3e-9 ?

Kd2 = 8.1e-9

[concentrations]

L = 10.4e-6

[responses]

L = 27000 ?

LM = 9000 ?

[equilibria]

directory ./data\_directory

extension txt

variable M

file data\_file | concentration E = 93.9e-6

[output]

directory ./output\_directory

**Fura-2 vs. <sup>C96</sup>RIDC-1<sub>4</sub> for four consecutive binding equilibria.** This script describes the competition between Fura-2 and <sup>C96</sup>RIDC-1<sub>4</sub> for Zn<sup>2+</sup>. Scripts similar to this one were used to fit one and two consecutive zinc binding equilibria, as well as both models for Ni<sup>2+</sup> and Cu<sup>2+</sup>. See note below for modifications used to fit other models.

[task]

task = fit

data = equilibria

; L ... Fura-2

; P ... 96C

; M ... Zn - competing ligand

[mechanism]

L + M <=> LM : Kd1 dissoc

P + M <=> PM : Kd2 dissoc

PM + M <=> PMM : Kd3 dissoc

PMM + M <=> PMMM : Kd4 dissoc

PMMM + M <=> PMMMM : Kd5 dissoc

[constants]

Kd1 = 5.7e-9

Kd2 = 3e-9 ?

Kd3 = 2e-8 ?

Kd4 = 3e-8 ?

Kd5 = 7e-8 ?

[concentrations]

L = 10e-6

[responses]

L = 27000 ?

LM = 9000 ?

[equilibria]

directory ./data\_directory

extension txt

variable M

file data\_file | concentration P = 30e-6

[output]

directory ./output\_directory

**Notes on other models:**

1) *Zn – 2 consecutive equilibria*: To account for two binding equilibria, each of which represents the association of two  $Zn^{2+}$ , the concentration of protein was doubled relative to the above model. The equilibrium expressions are reduced to

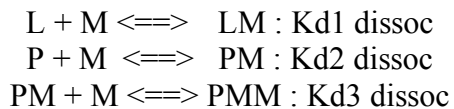

2) *Zn – 1 equilibrium*: The concentration of protein was quadrupled and the following equilibria were used

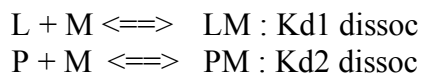

3) *Ni and Cu – 2 consecutive equilibria*: The concentration of protein was set to the tetramer concentration and the equilibrium expressions outlined in note 1 were used.

4) *Ni and Cu – 1 equilibrium*: The concentration of protein was set to half the tetramer concentration and the equilibrium expressions outlined in note 2 were used.

## Supporting Figures

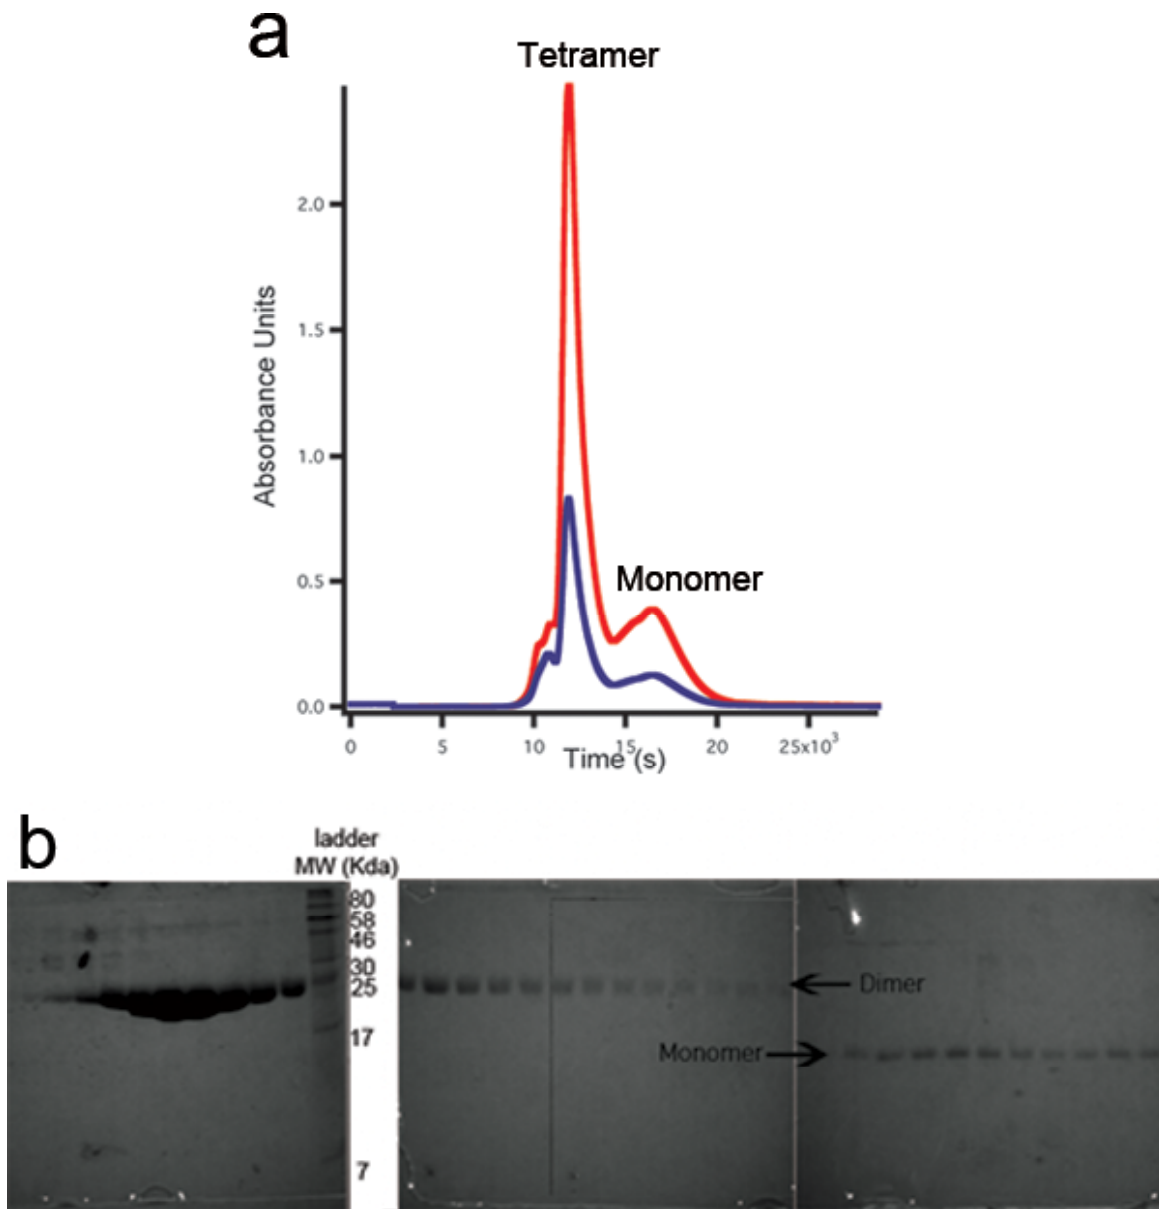

**Figure S1.** Purification and characterization of disulfide crosslinked  $^{96}\text{C}$ RIDC-1 ( $^{96}\text{C}$ RIDC-1<sub>2</sub>). (a) Size-exclusion chromatogram of air-oxidized  $^{96}\text{C}$ RIDC-1. The lack of distinct peaks for dimer and tetramer is likely due to the high loading concentrations, resulting in complete tetramer formation. (b) Non-reducing, denaturing SDS-PAGE gels of fractions collected from SEC.

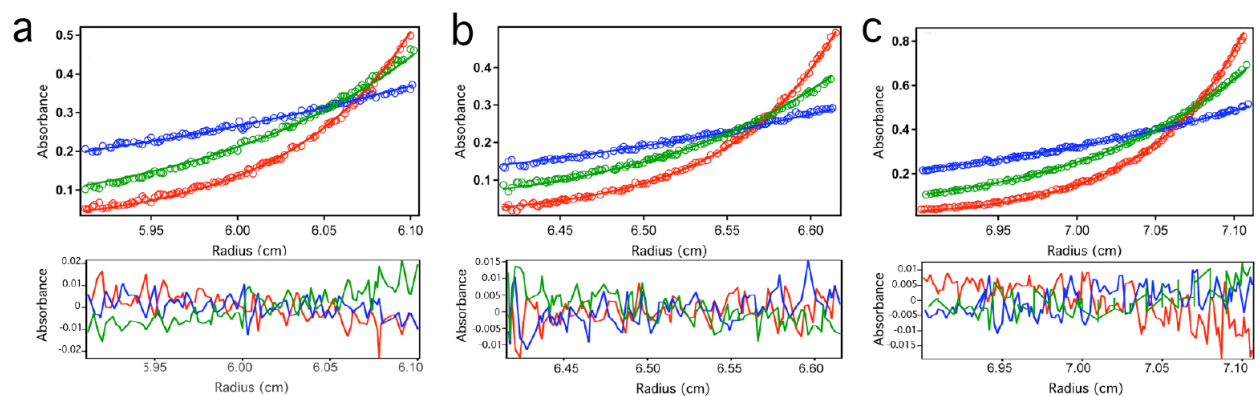

**Figure S2.** Sedimentation equilibrium (SE) profiles for  $^{C96}$ RIDC-1. (a)  $1 \mu\text{M}$   $^{C96}$ RIDC-1<sub>2</sub> at 10000, 15000 and 20000 rpm. (b)  $2.5 \mu\text{M}$   $^{C96}$ RIDC-1<sub>2</sub> at 10000, 15000 and 20000 rpm. (c)  $12.5 \mu\text{M}$   $^{C96}$ RIDC-1<sub>2</sub> at 10000, 15000 and 20000 rpm. All samples contain 20 mM Tris (pH 7), 150 mM NaCl and 5 mM EDTA and were run at 25° C. Scans shown here were globally fit to a dimer-tetramer model.

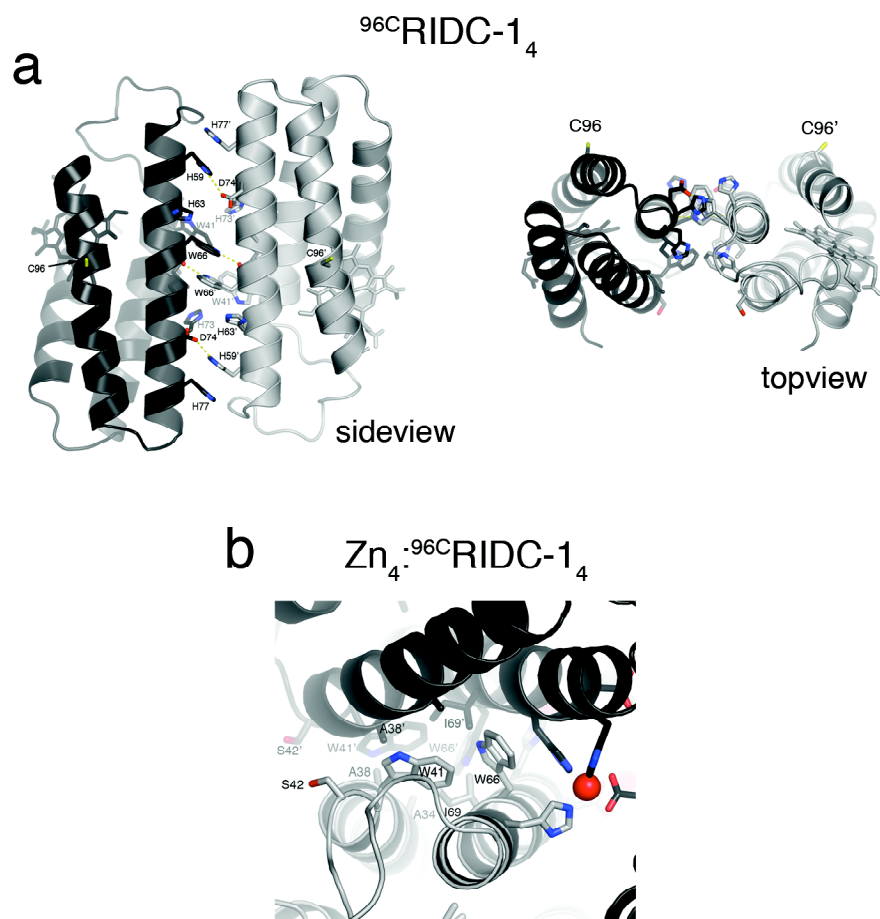

**Figure S3.** Interactions between engineered residues in interfaces *i1* and *i2*. (a)  $^{96}\text{C}^{\text{R}}\text{RIDC-1}_4$ ; (b)  $\text{Zn}_4\text{:}^{96}\text{C}^{\text{R}}\text{RIDC-1}_4$ .



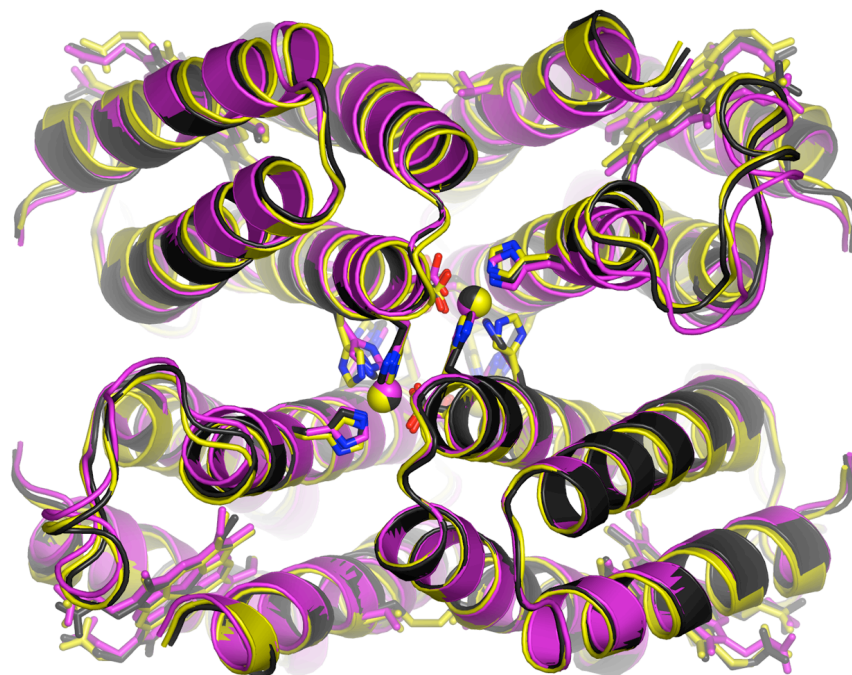

**Figure S4.** Superposition of Zn<sub>4</sub>:MBPC-1<sub>4</sub> (yellow), Zn<sub>4</sub>:RIDC-1<sub>4</sub> (magenta) and Zn<sub>4</sub>:<sup>C96</sup>RIDC-1<sub>4</sub> (grey) crystal structures.

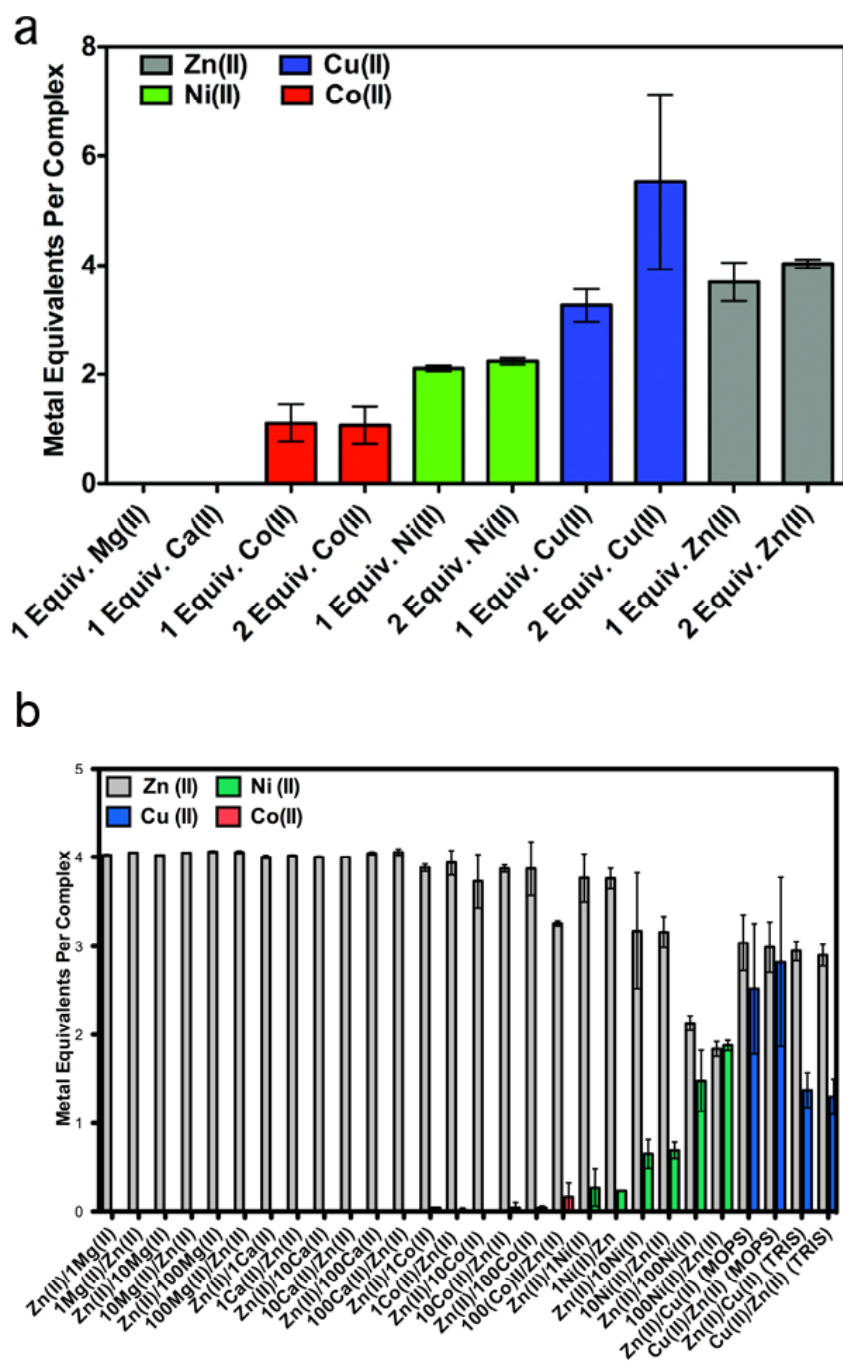

**Figure S5.** Divalent metal binding properties of  $^{C96}$ RIDC-14. (a) Equivalents of  $M^{2+}$  bound to  $^{C96}$ RIDC-14 following size exclusion chromatography, as determined by ICP-OES measurements (in 20 mM MOPS buffer). The protein concentration was determined using the single heme Fe of each RIDC-1 monomer as an internal standard. (b) Complete  $Zn^{2+}$  versus  $M^{2+}$  competition binding assay for  $^{C96}$ RIDC-14 binding (in 20 mM MOPS buffer or in 20 mM TRIS where indicated). This plot includes metal competition assays carried out in both directions (incubation with  $Zn^{2+}$  followed by  $M^{2+}$ , or incubation with  $M^{2+}$  followed by  $Zn^{2+}$ ). The results show that the metal content is the same in both directions in each case, indicating that metal binding to  $^{C96}$ RIDC-14 is under thermodynamic control under the conditions employed.

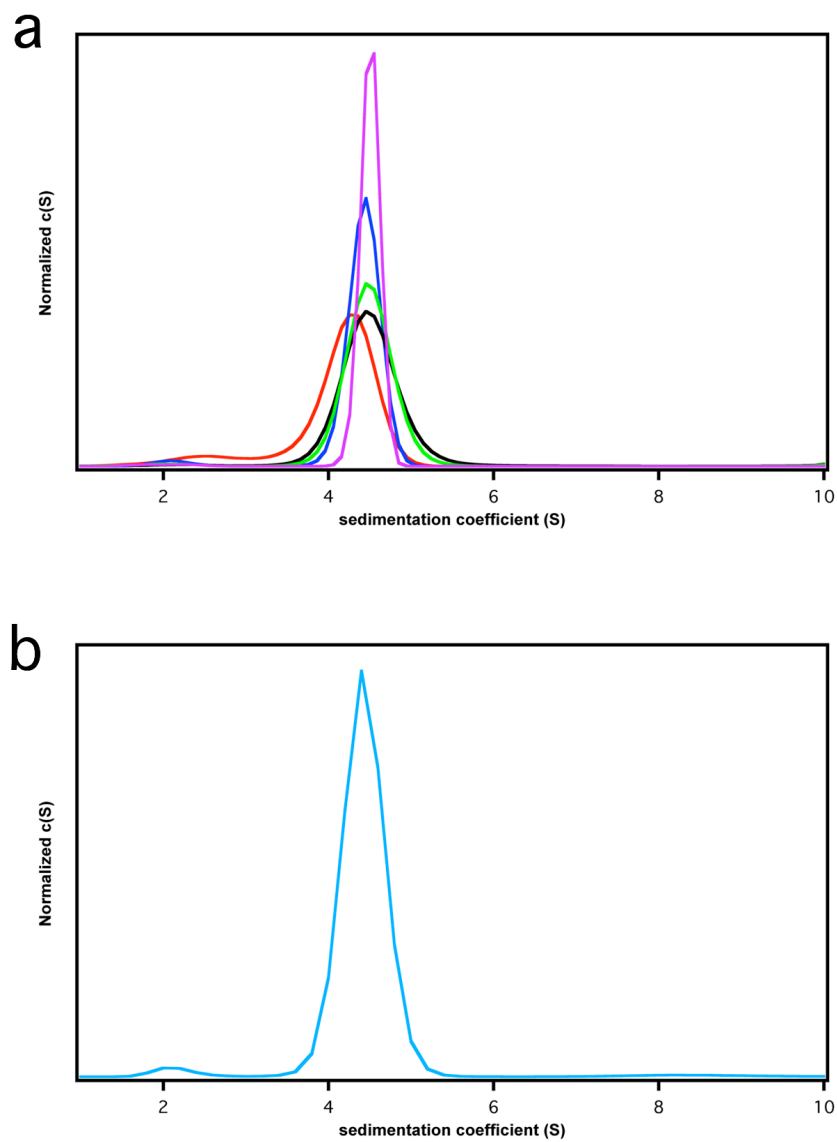

**Figure S6.** Sedimentation coefficient distributions for  $^{C96}$ RIDC-1 in the presence and absence of metals, showing the formation of tetrameric forms at all conditions. (a) (red trace)  $2.5 \mu\text{M } ^{C96}\text{RIDC-1}_2 + 5 \text{ mM EDTA}$  ; (green trace)  $2.5 \mu\text{M } ^{C96}\text{RIDC-1}_2 + 5 \mu\text{M Zn}$ ; (black trace)  $2.5 \mu\text{M } ^{C96}\text{RIDC-1}_2 + 5 \mu\text{M Cu}$ ; (blue trace)  $2.5 \mu\text{M } ^{C96}\text{RIDC-1}_2 + 5 \mu\text{M Co}$ ; (purple trace)  $15 \mu\text{M } ^{C96}\text{RIDC-1}_2$  and  $30 \mu\text{M Ni}$ . (b)  $15 \mu\text{M } ^{C96}\text{RIDC-1}_2 + 30 \mu\text{M Zn}$  (initial) +  $30 \mu\text{M Cu}$  (initial). This sample was run down a gel-filtration column following incubation with metals in a manner analogous to competition experiments.

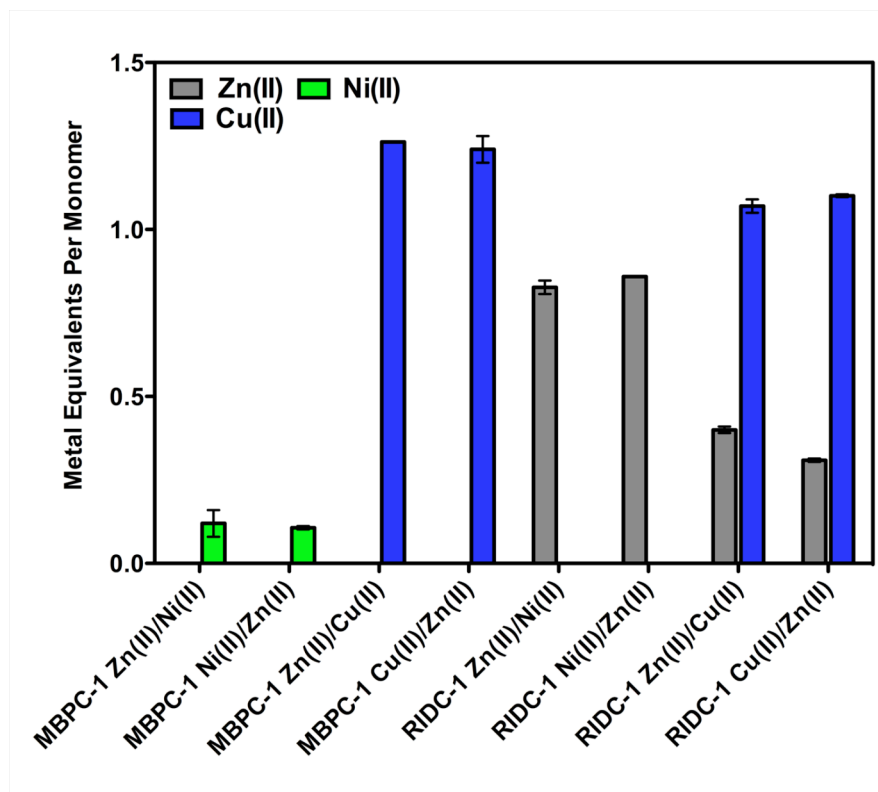

**Figure S7.**  $Zn^{2+}$  versus  $M^{2+}$  competition binding assay for MBPC-1 and RIDC-1. These experiments were performed in an identical fashion as those for metal binding to  $^{C96}$ RIDC-1<sub>4</sub>. Note that the y-axis reports metal equivalents per monomer instead of tetramer, since MBPC-1 and RIDC-1 do not form persistent tetramers without metal. These competition binding experiments show that both  $Ni^{2+}$  and  $Cu^{2+}$  outcompete  $Zn^{2+}$  for MBPC-1 binding. In the case of RIDC-1,  $Cu^{2+}$  still outcompetes  $Zn^{2+}$  (though not to the same extent as MBPC-1).

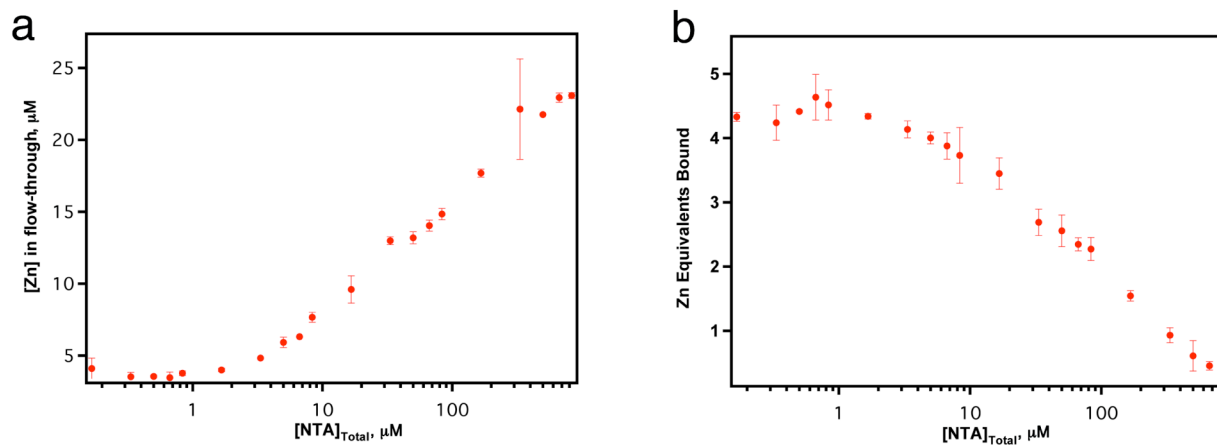

**Figure S8.** Raw data for the determination of Zn binding affinity to  $^{C96}$ RIDC-1<sub>4</sub> using PAR as an indicator (see experimental section for details). (a) Concentration of Zn(II) in flow-through, and (b) Zn equivalents bound to  $^{C96}$ RIDC-1<sub>4</sub> as a function of added NTA. A rough estimate for the Zn- $^{C96}$ RIDC-1<sub>4</sub> dissociation constant can be made based on the NTA concentration, at which 50% of binding sites are occupied. b shows that 22 μM  $^{C96}$ RIDC-1<sub>4</sub> is half Zn-bound at ~100 μM NTA, yielding a dissociation constant of ~3 nM based on a Zn-NTA dissociation constant of 15 nM. This value is in good agreement with the value of 3.3 nM determined by plotting free Zn concentration versus Zn equivalents per tetramer (Figure 4a).

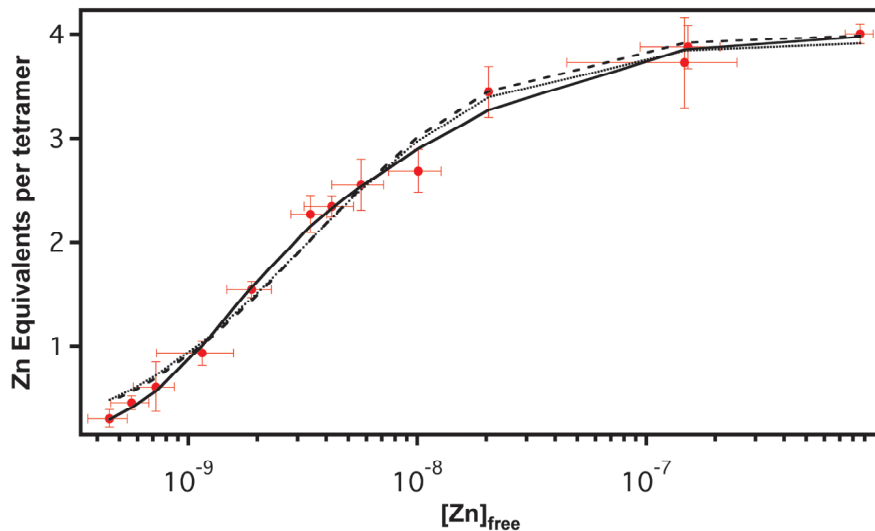

**Figure S9.** Zn-binding isotherm of  $^{C96}$ RIDC-1<sub>4</sub> determined using NTA as a competing ligand. The fits obtained using DynaFit are shown for the following different models: solid line, four consecutive Zn binding equilibria (1+1+1+1); dashed line, two consecutive binding equilibria (2+2); dotted line; single binding equilibrium (4×1). The mathematical expressions used for these models can be found in the Experimental Section. The obtained dissociation constants are as follows. 4×1 model: 3.3(3) nM; 2+2 model: 2.0(3) and 6(1) nM; 1+1+1+1 model: 3(3) nM, 0.8(8) nM, 5(3) nM and 30(10) nM.

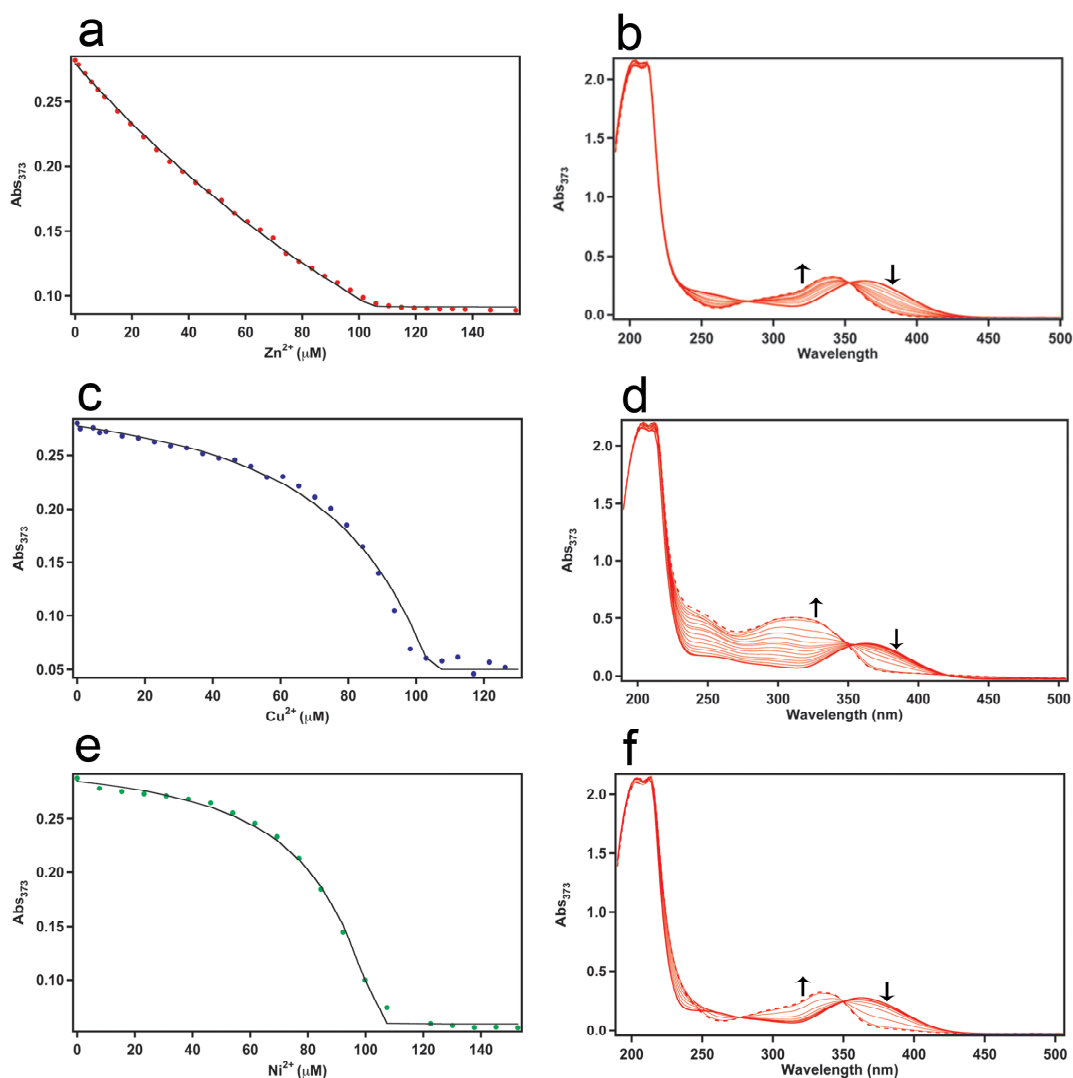

**Figure S10.** Metal binding isotherms and UV-vis spectra for Fura-2-EGTA competition binding experiments. (a) Binding isotherm for 11 μM Fura-2 and 94 μM EGTA titrated with Zn<sup>2+</sup>. (b) UV-vis spectra corresponding to individual points in (a). (c) Binding isotherm for 11 μM fura-2 and 94 μM EGTA titrated with Cu<sup>2+</sup>. (d) UV-vis spectra corresponding to individual points in (c). (e) Binding isotherm for 11 μM fura-2 and 94 μM EGTA titrated with Ni<sup>2+</sup>. (f) UV-vis spectra corresponding to individual points in (e). All titrations were fit to 1:1 M<sup>2+</sup>:Fura-2 and 1:1 M<sup>2+</sup>:EGTA using DynaFit.

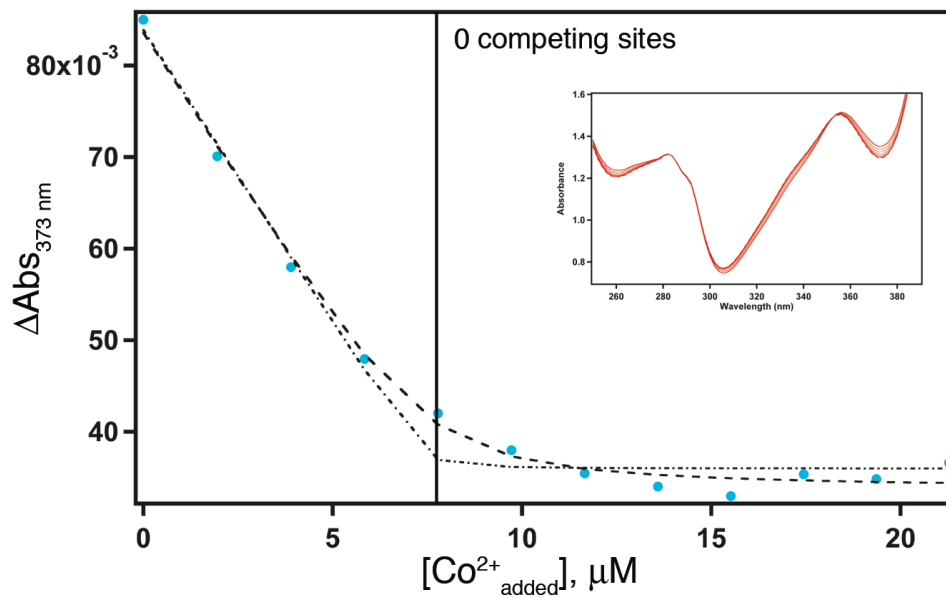

**Figure S11.**  $\text{Co}^{2+}$  binding isotherm for Fura-2– $\text{C}^{96}\text{RIDC-1}_4$  competition experiments; corresponding changes in the Fura-2 absorbance spectrum are shown in the inset. The samples contained 21  $\mu\text{M}$   $\text{C}^{96}\text{RIDC-1}_4$  and 8  $\mu\text{M}$  Fura-2. The titration shows that there is only one apparent site on  $\text{C}^{96}\text{RIDC-1}_4$  that is barely able to compete with Fura-2 for  $\text{Co}^{2+}$  binding, yielding a dissociation constant of 0.9  $\mu\text{M}$ .
